# Supplementary material
Source: PubMed Central journal article supplement (PMC3713491)

# Supplementary Figure 1

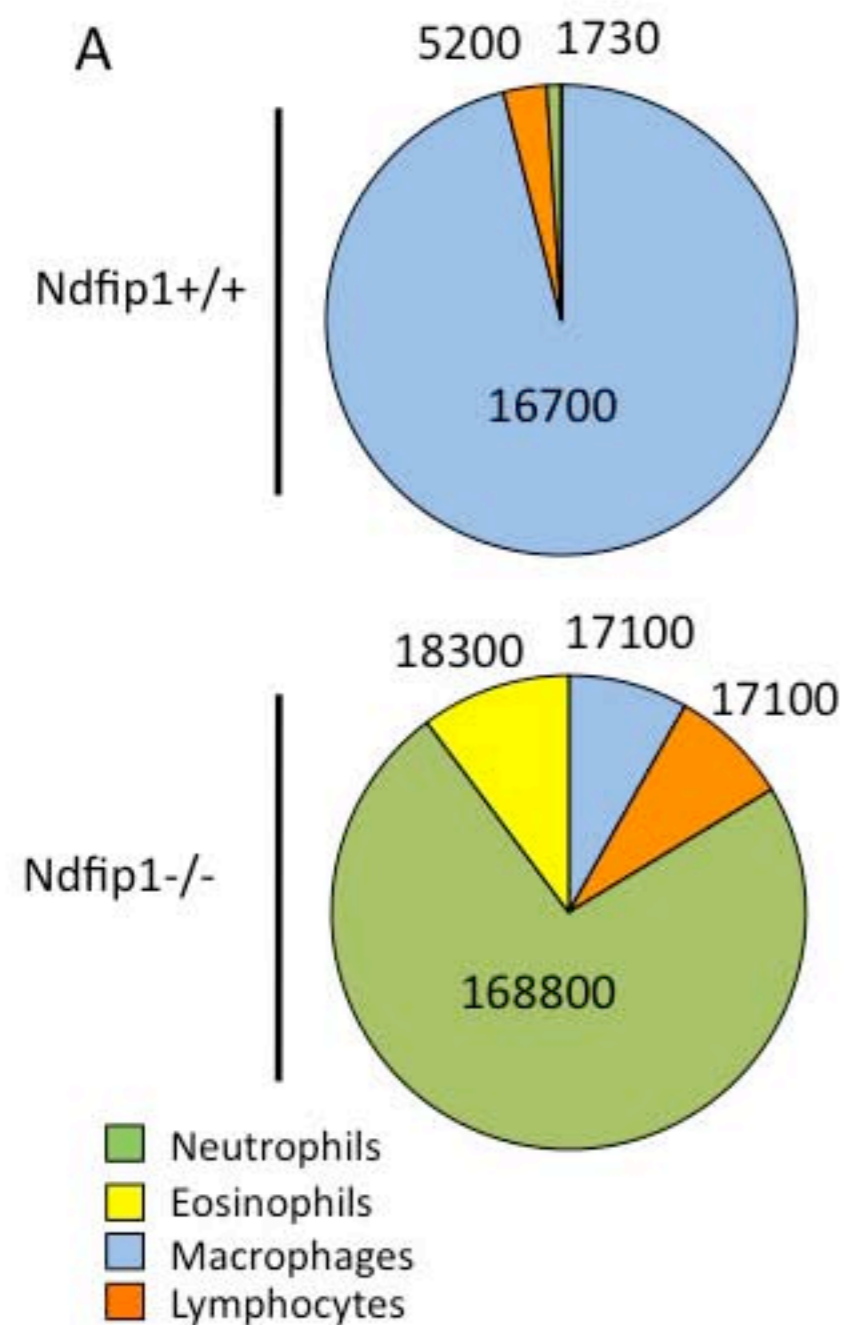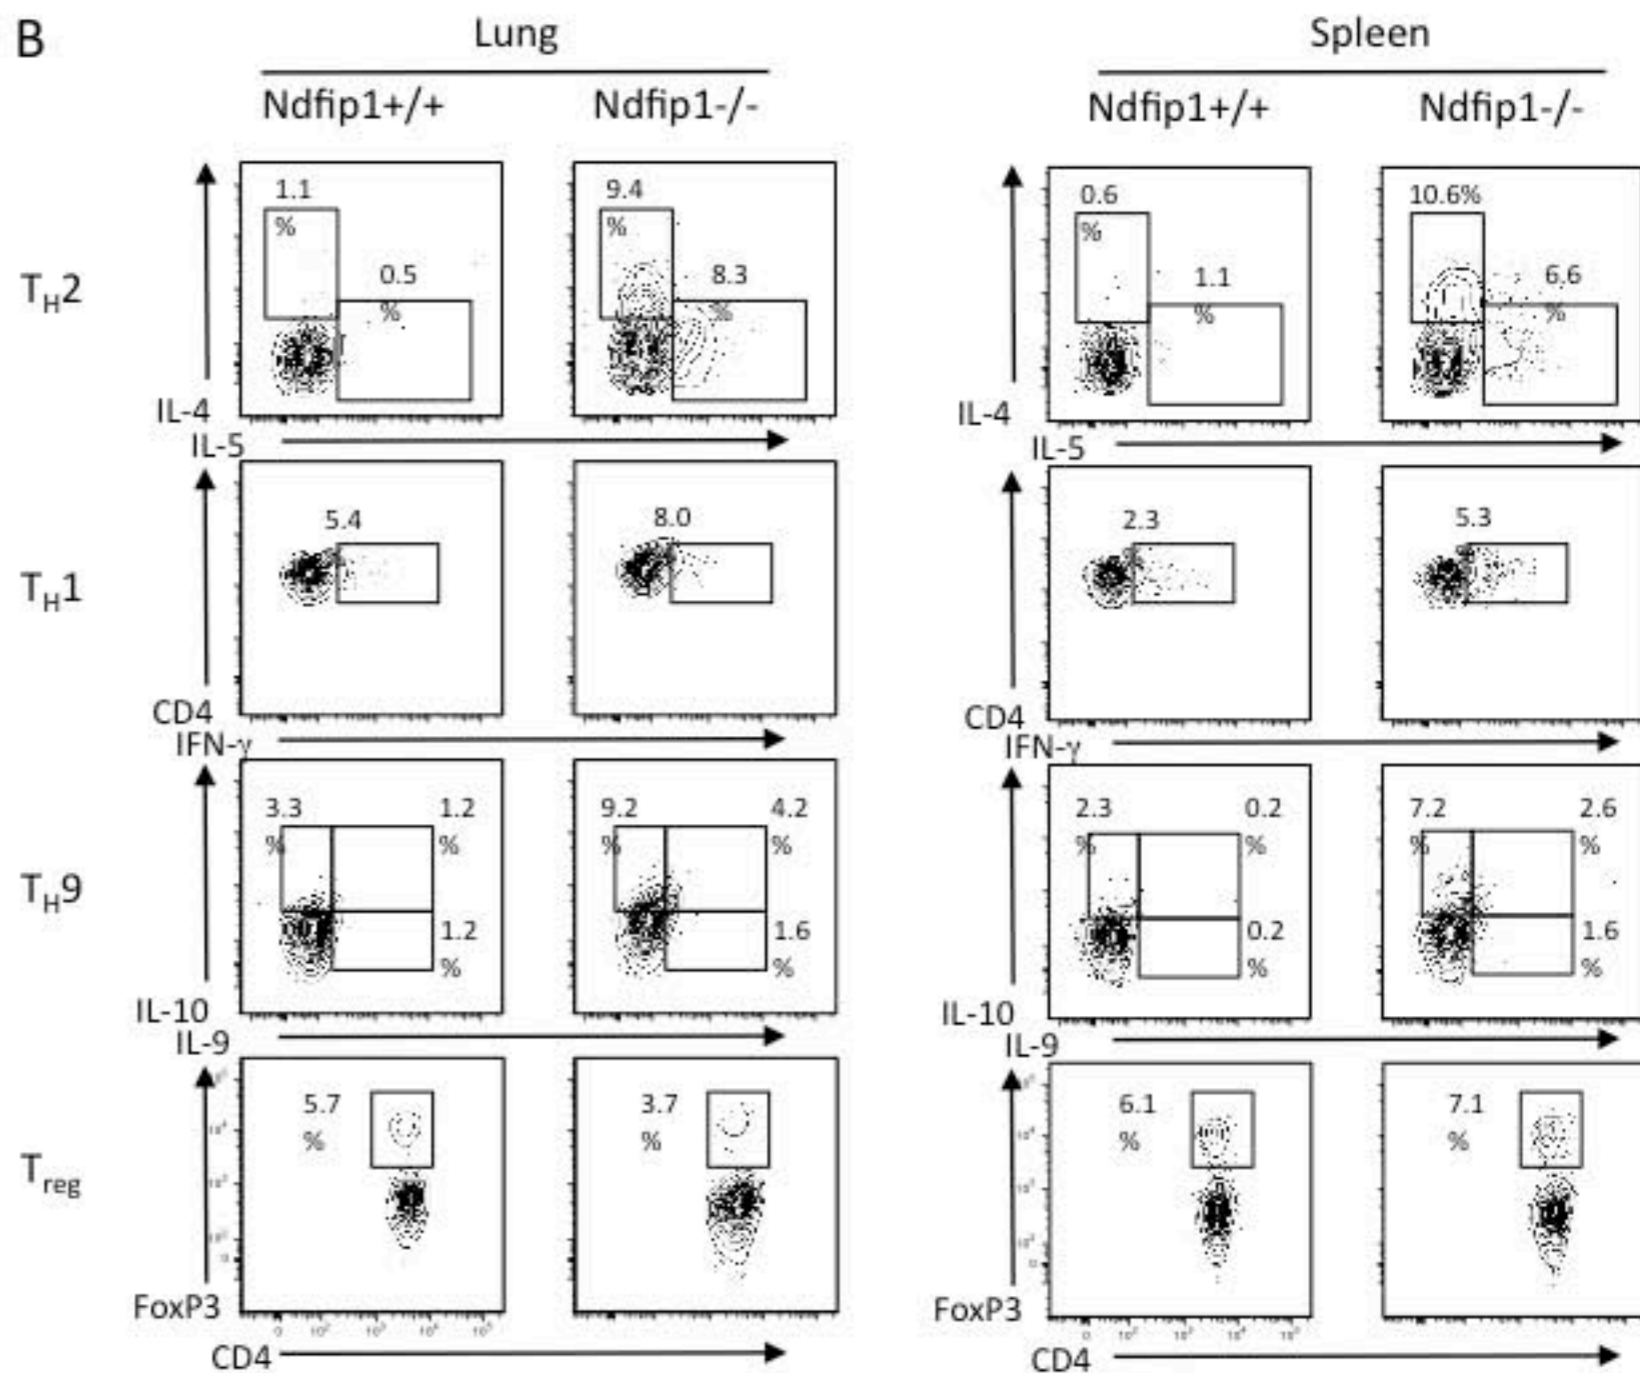

# Supplementary Figure 2

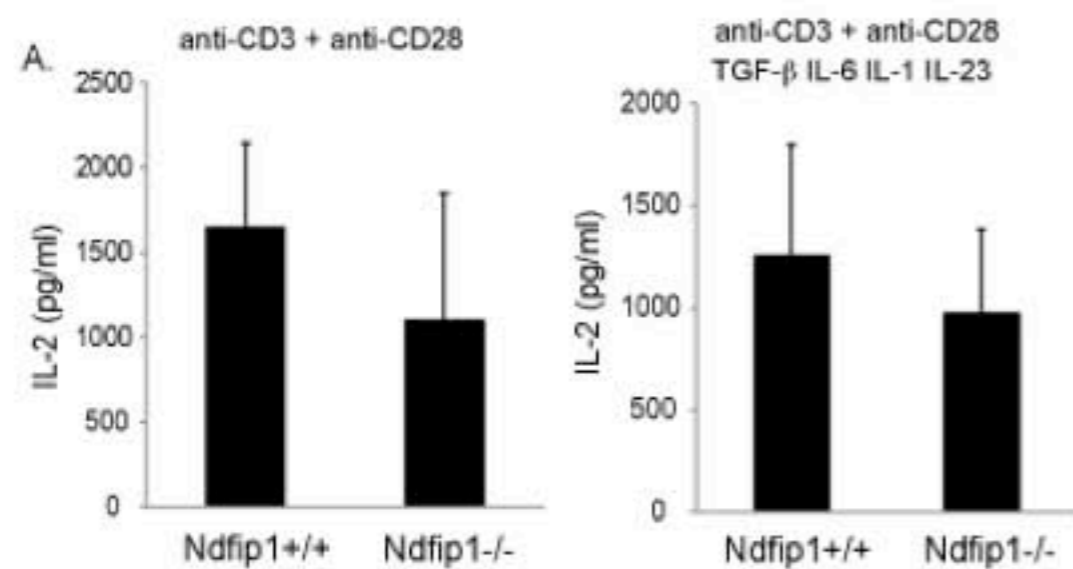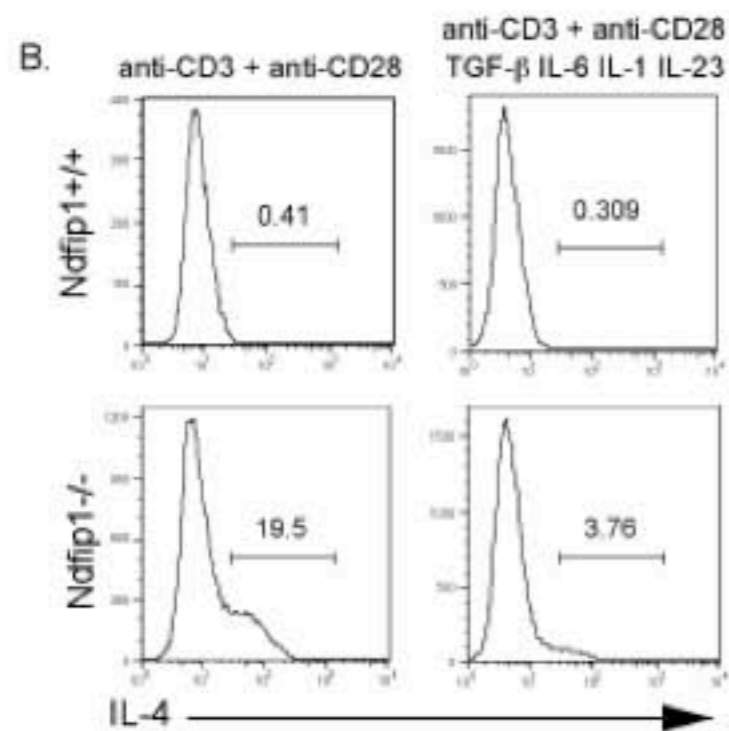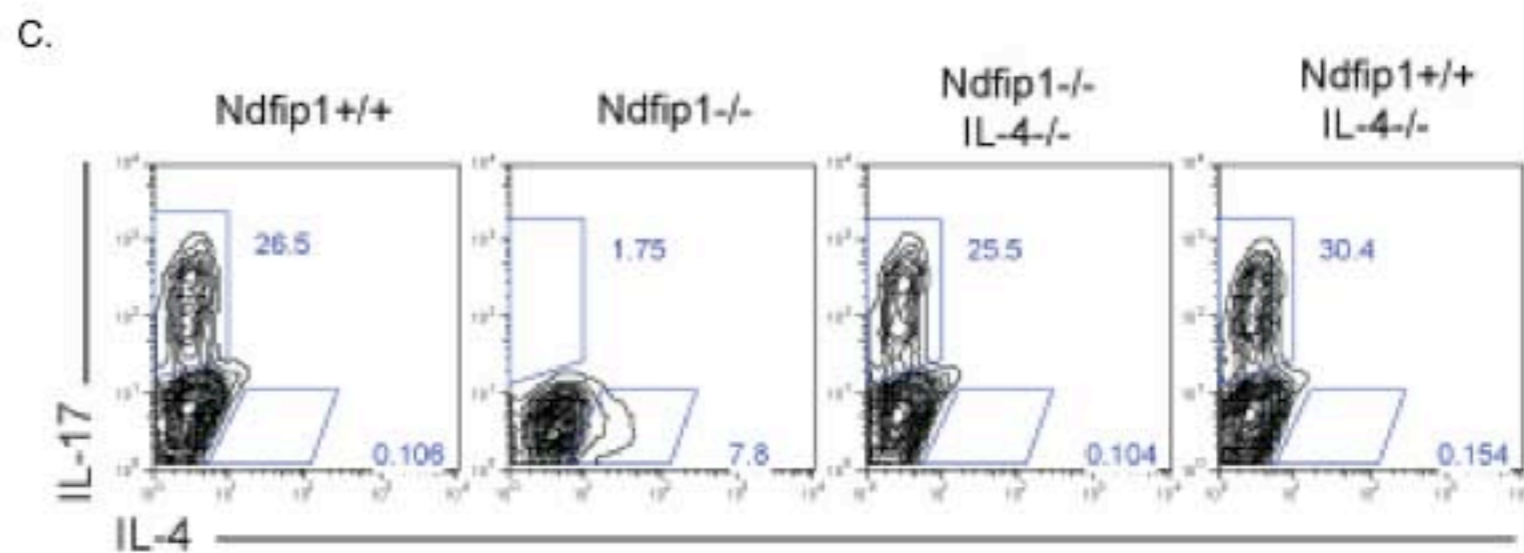

# Supplementary Figure 3

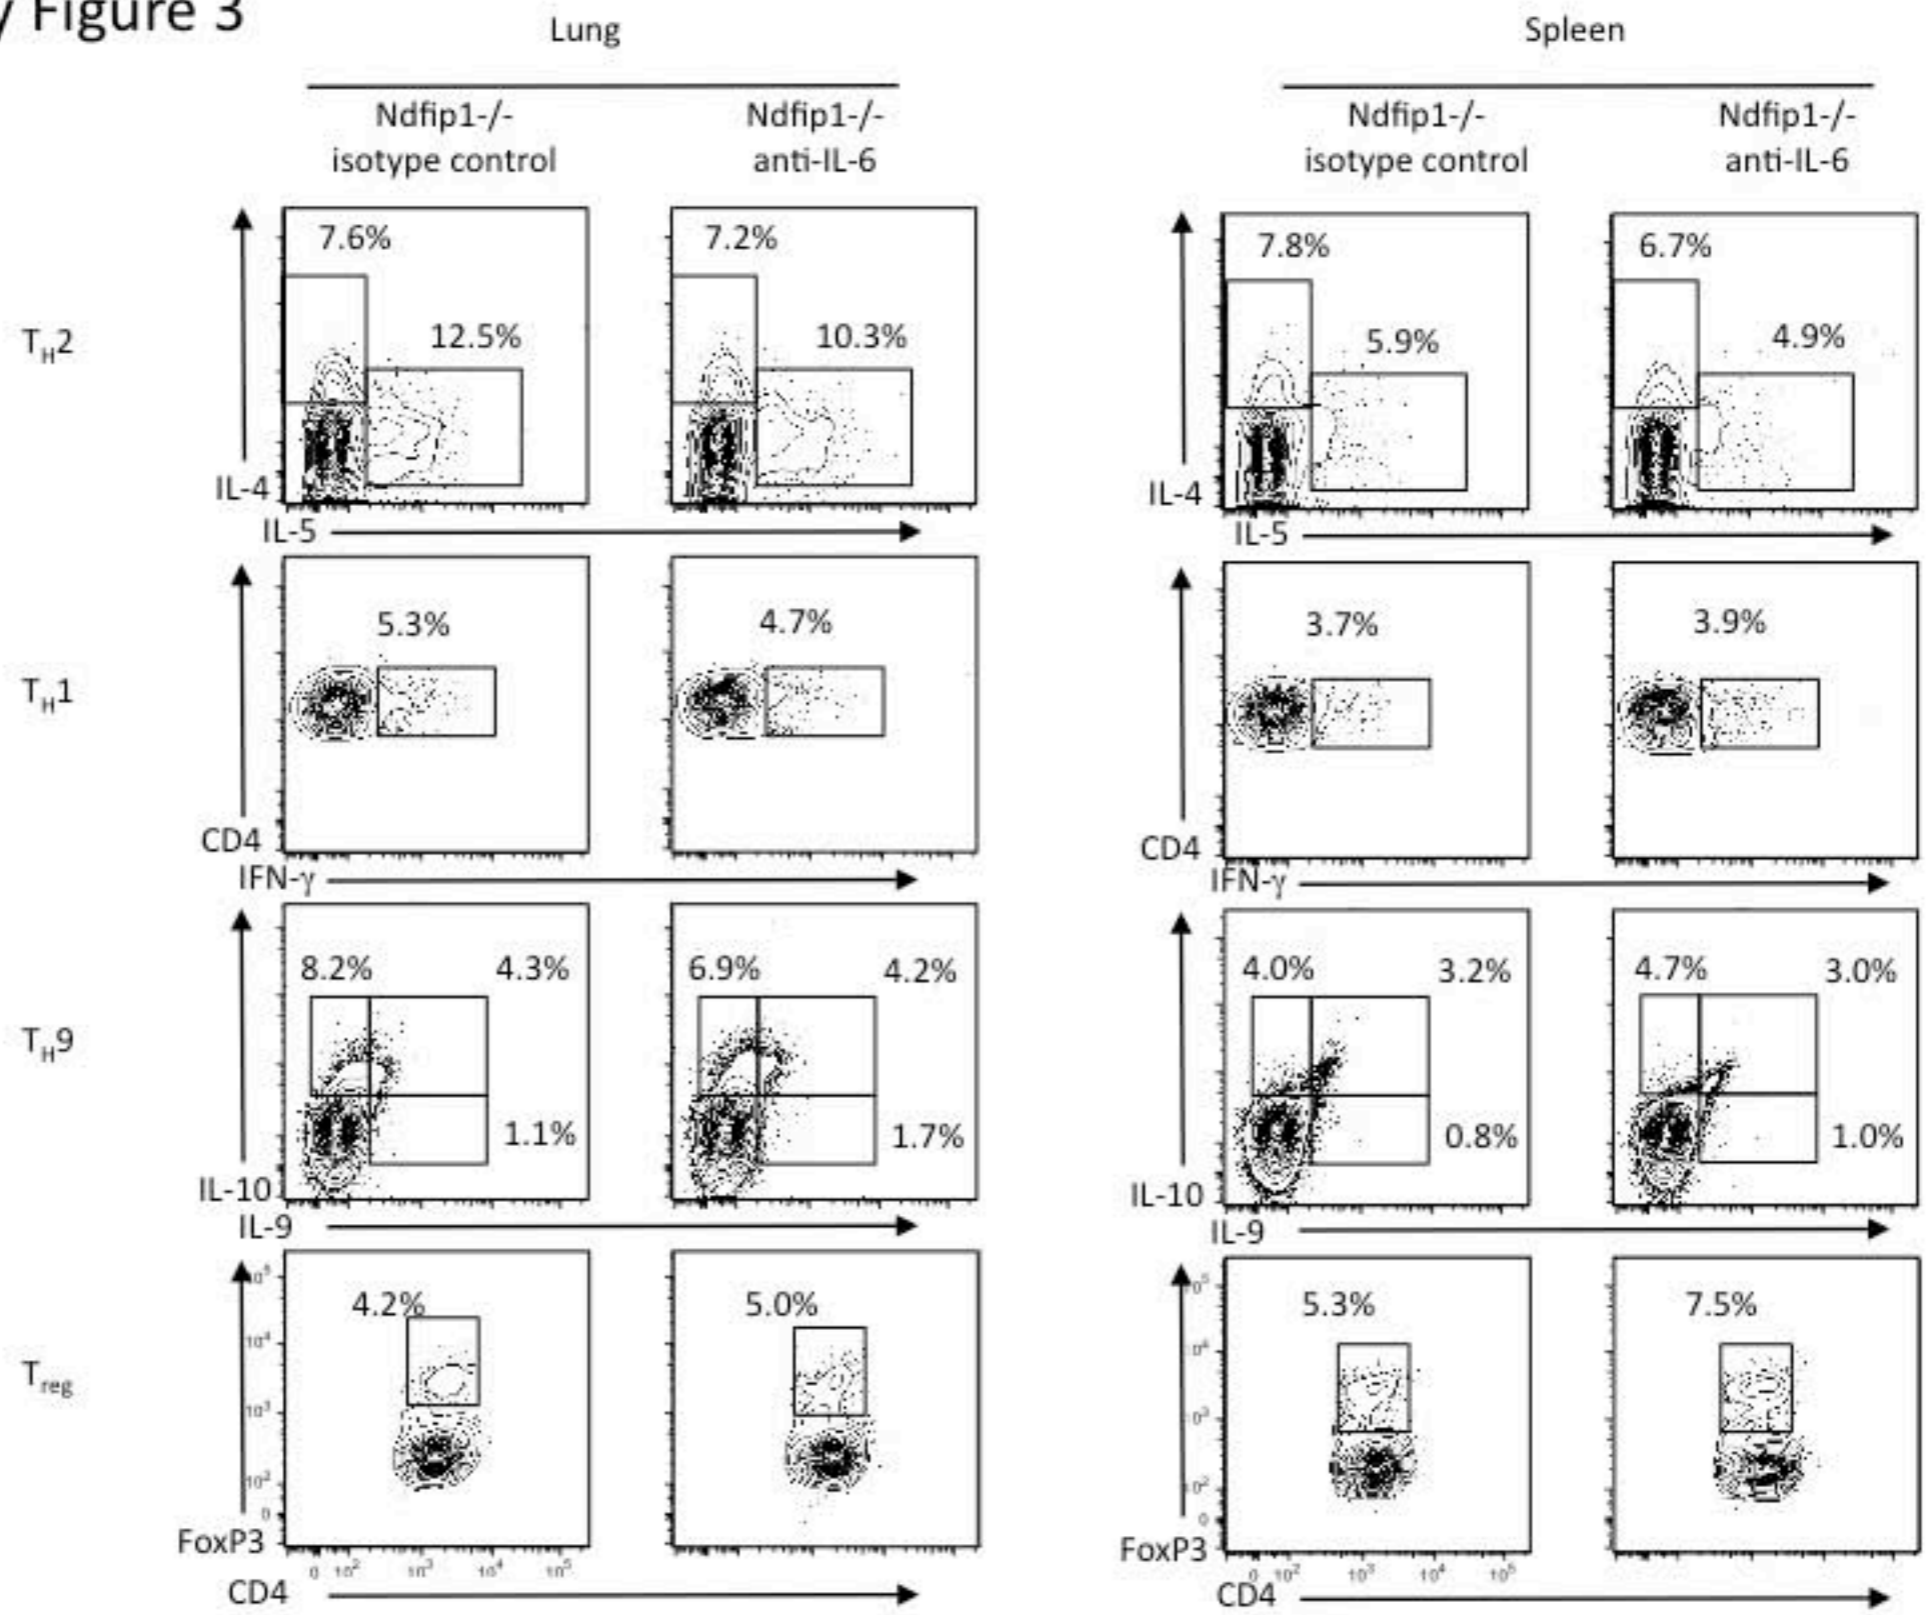

# Supplementary Figure 4

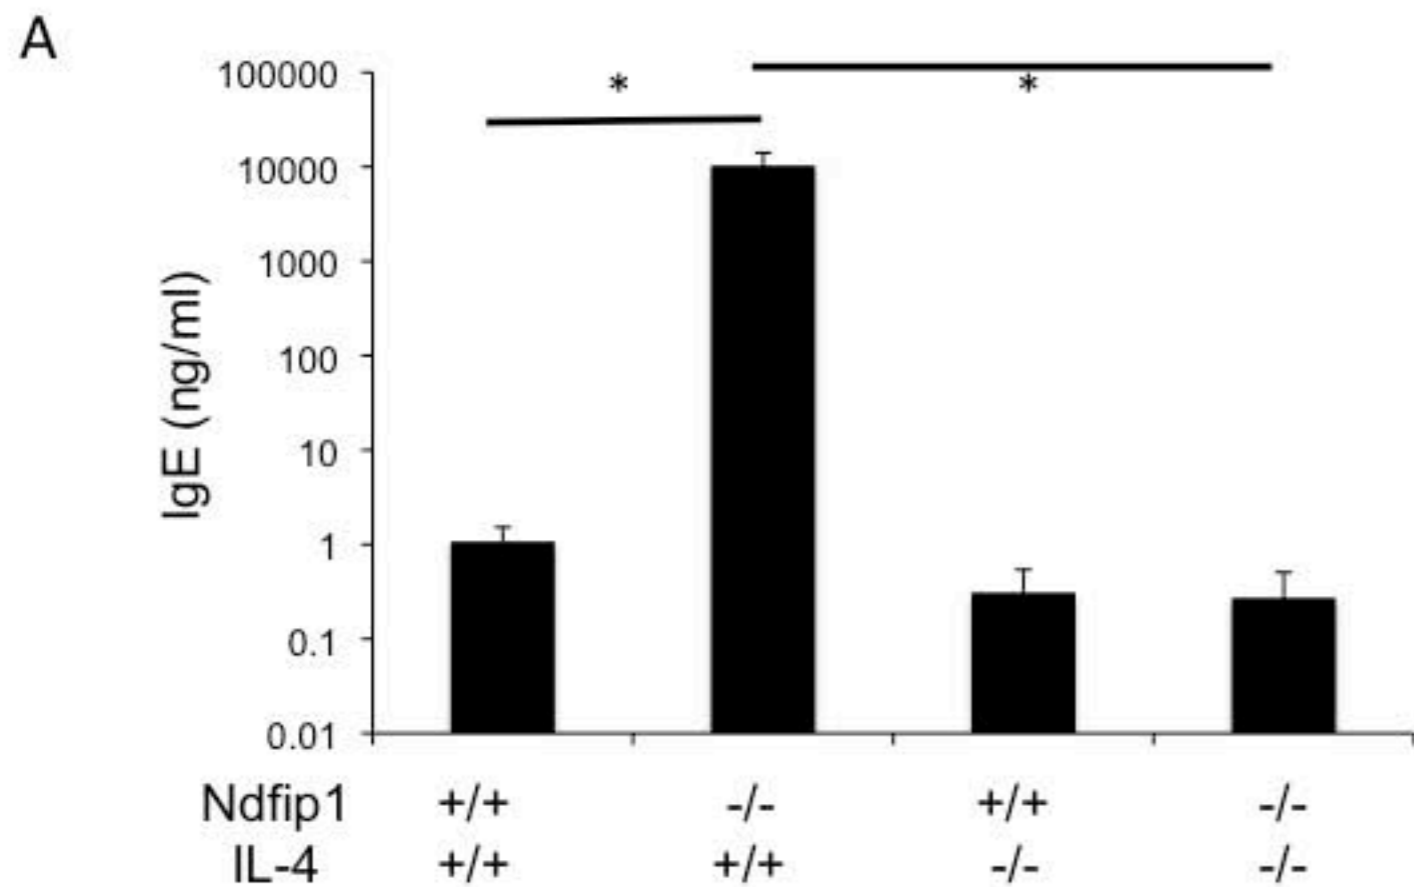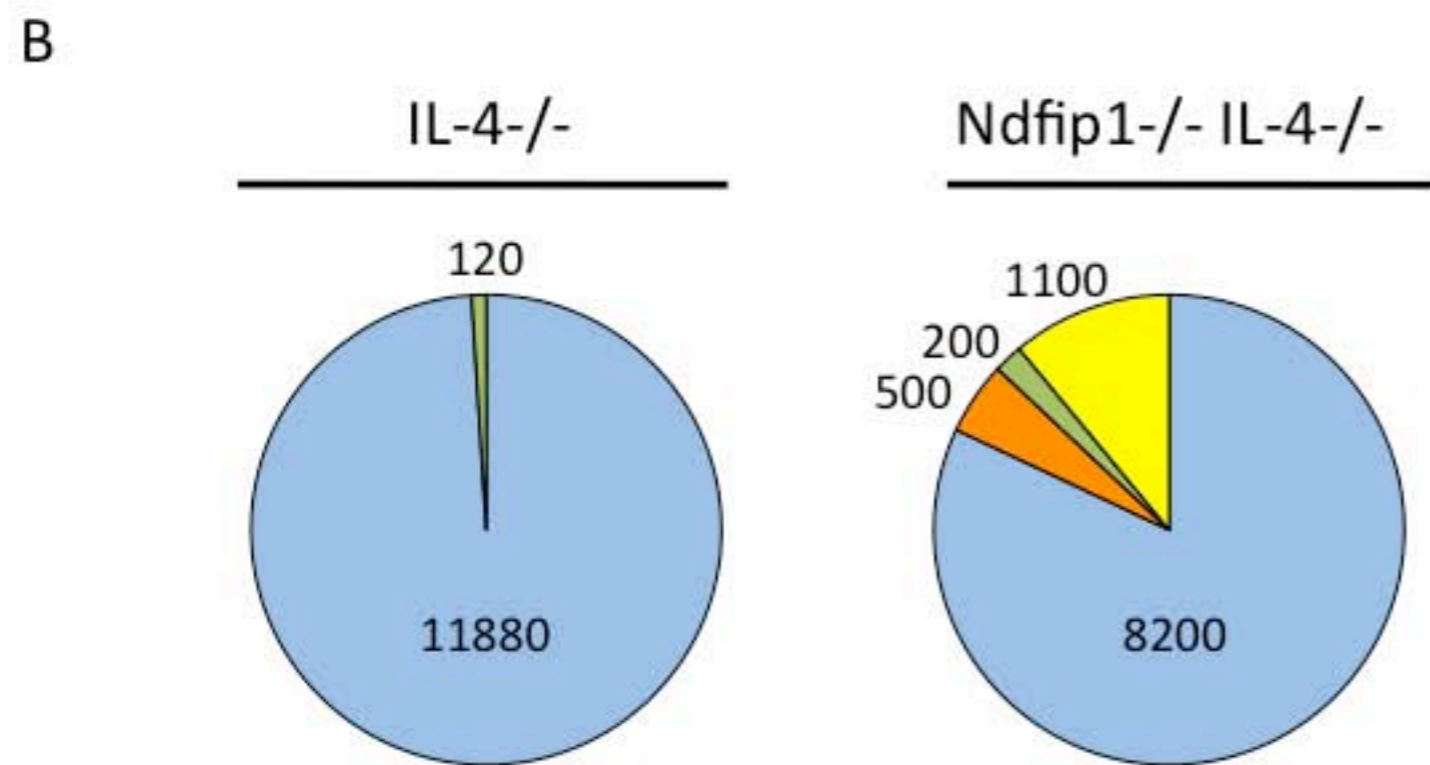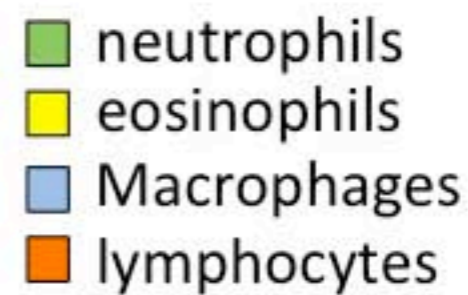

Supplementary Figure 4

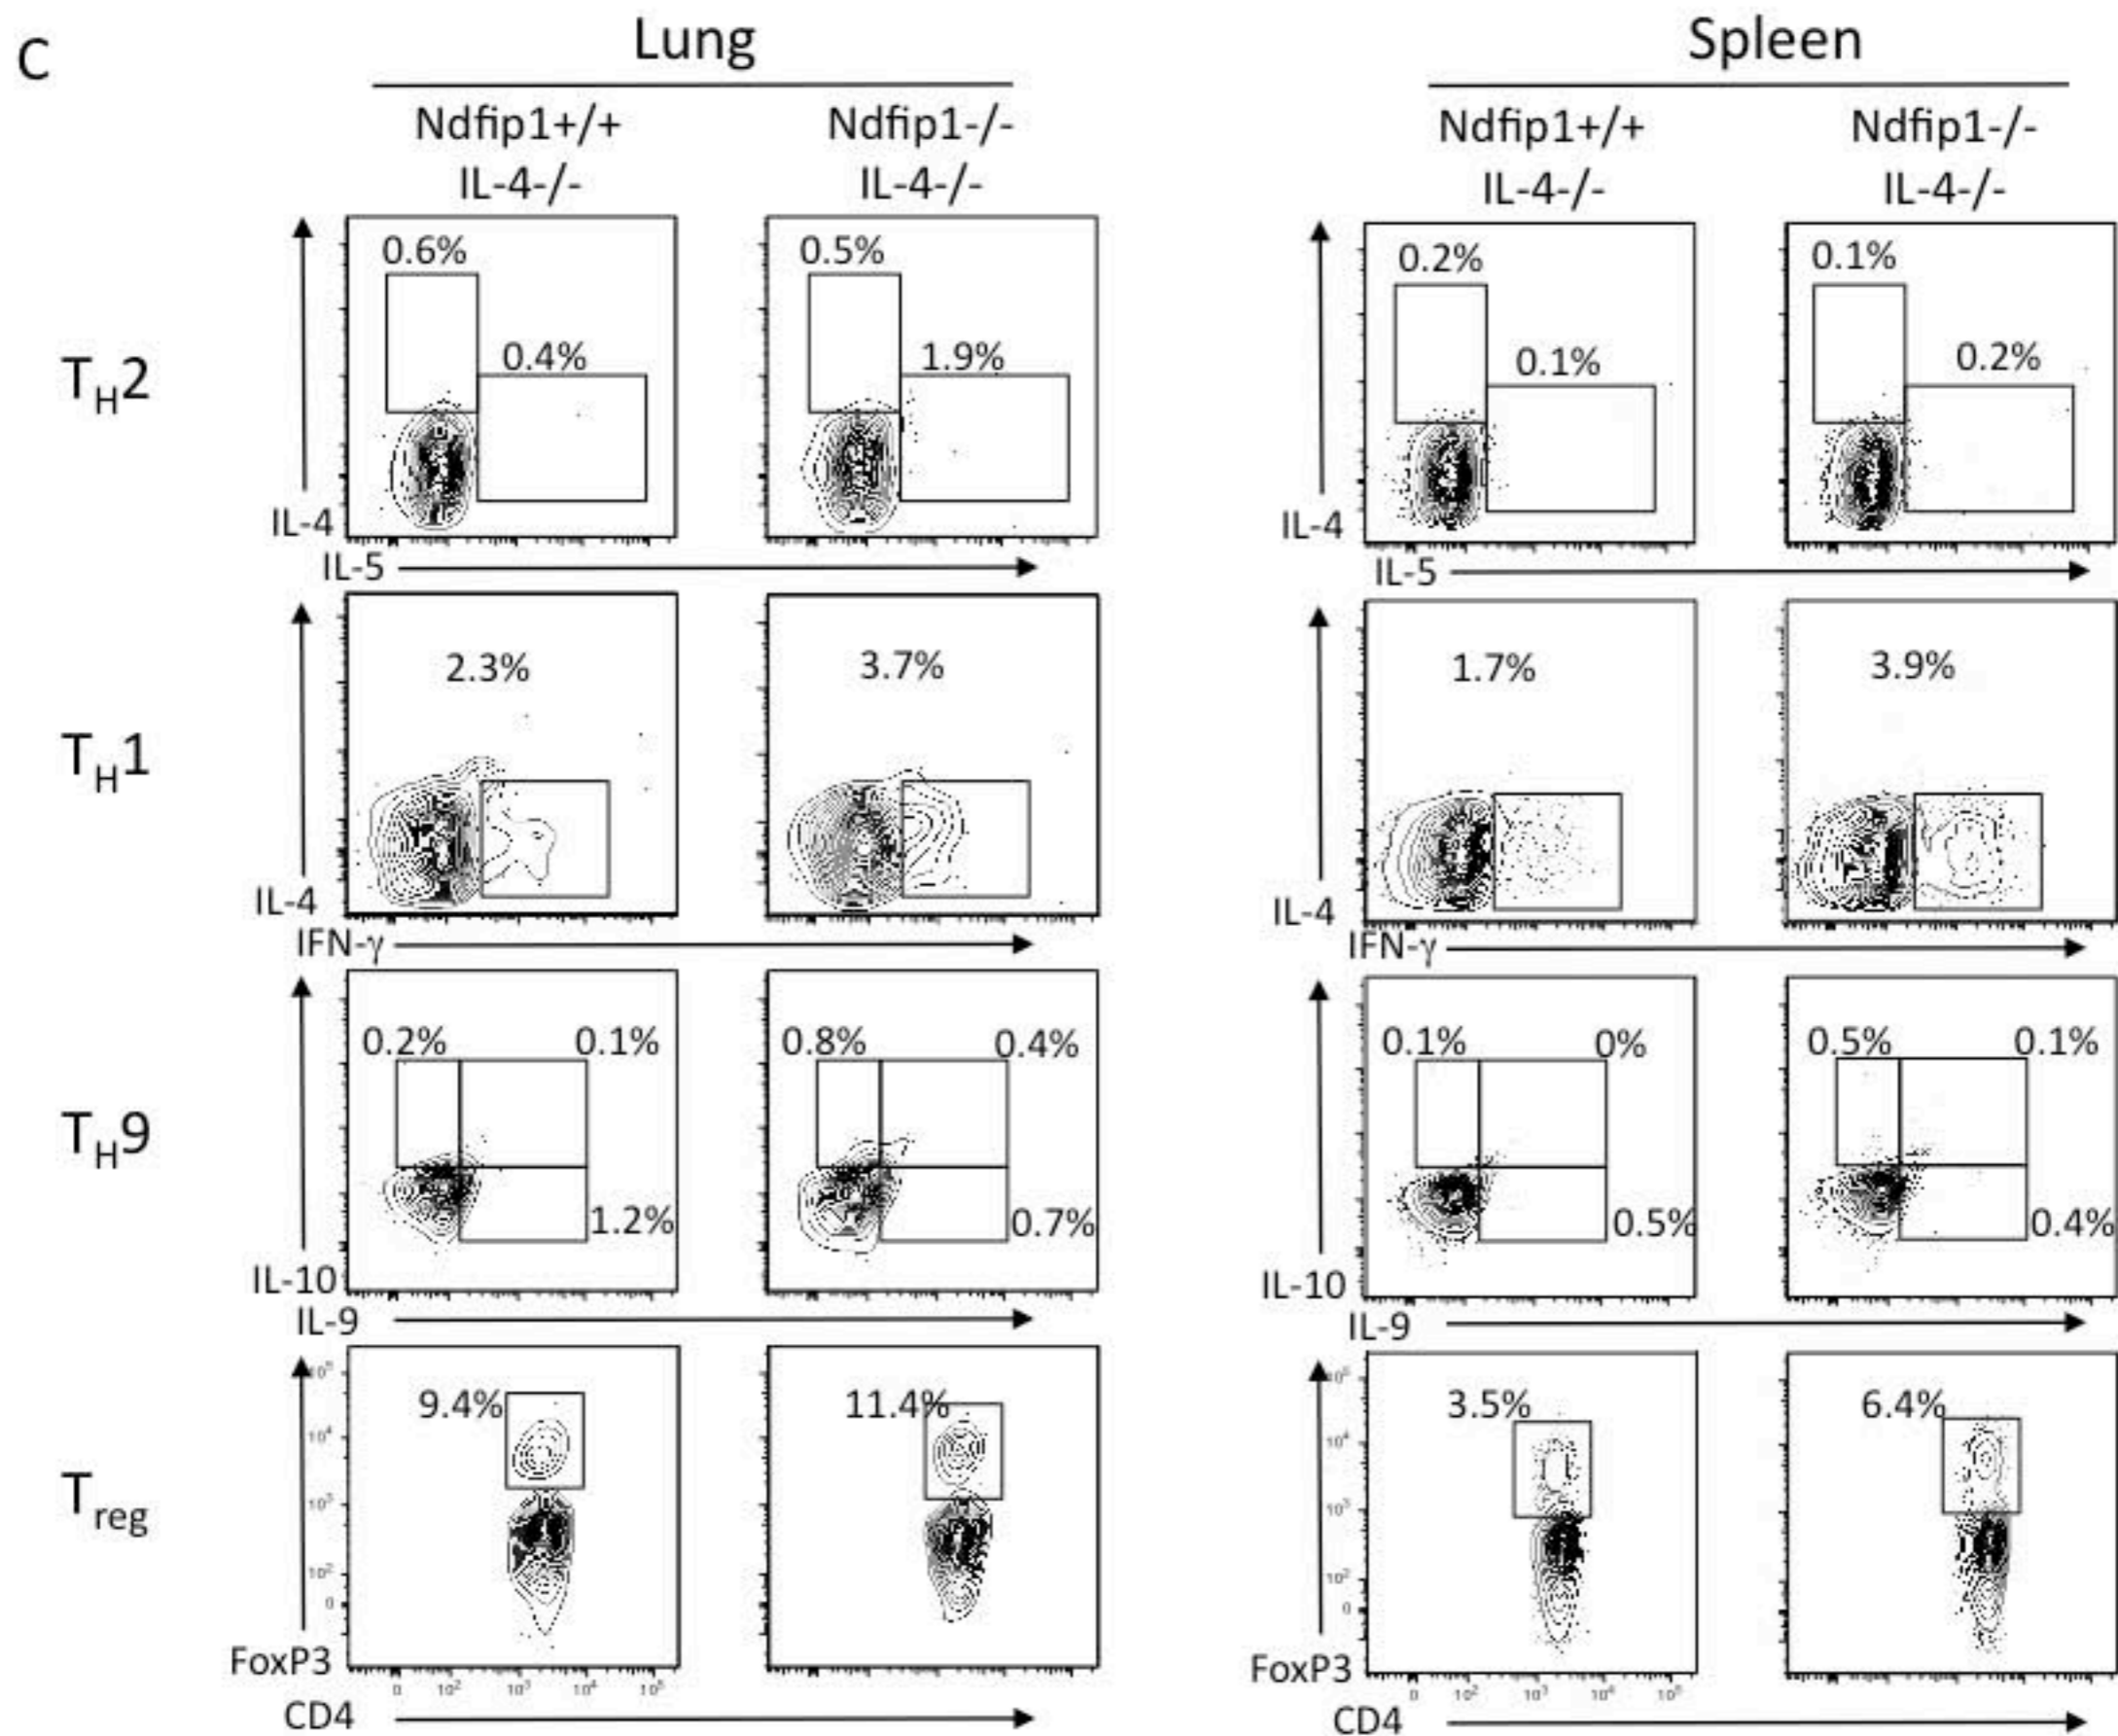

Supplement: NIHMS356494-supplement-2.pdf [file NIHMS356494-supplement-2.pdf]
